# Supplementary material
Source: PubMed Central journal article supplement (PMC4083456)
Supplement: NIHMS589701-supplement-Supporting_Information.pdf [file NIHMS589701-supplement-Supporting_Information.pdf]

## Supporting Information Figure 1

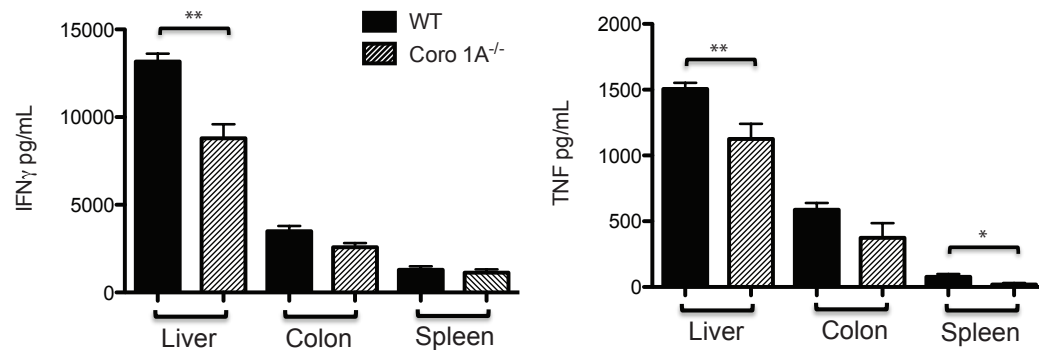

**Supporting Information Figure 1. Cytokine production, proliferation, and chemotaxis of Coro 1A<sup>-/-</sup> T-cells.** Lethally irradiated B6D2 recipients were injected with Tcon cells from Coro 1A<sup>-/-</sup> or WT donors supplemented with WT TCD BM. Fourteen days post transplantation, animals were perfused and organs were harvested and homogenized for cytokine production by ELISA. n=5 for Coro 1A<sup>-/-</sup> or WT.

## Supporting Information Figure 2

A

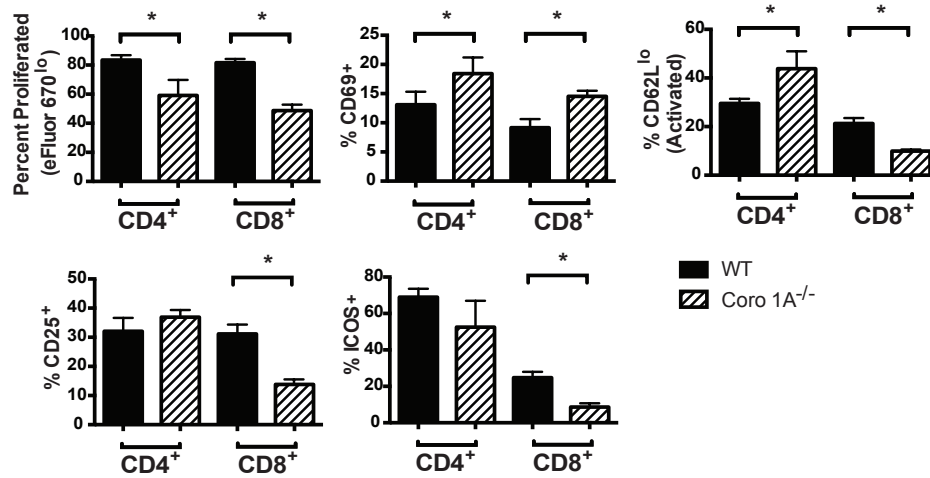

B

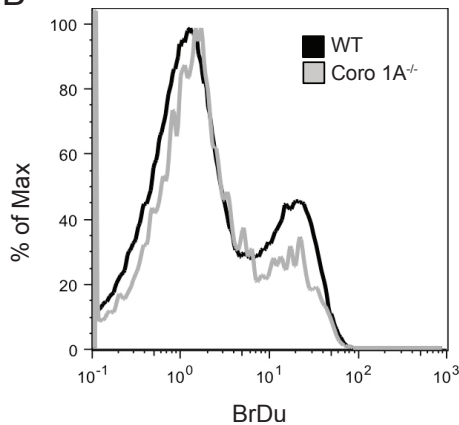

C

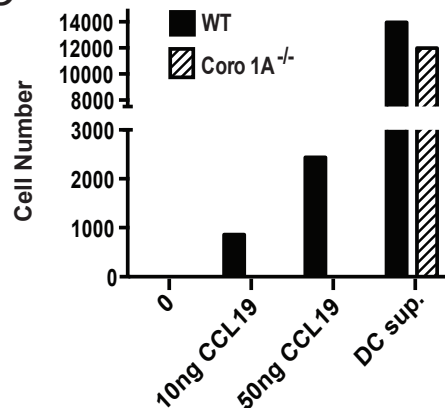

**Supporting Information Figure 2. Decreased proliferation in vivo in the absence of Coro 1A.** Coro 1A<sup>-/-</sup> GFP or WT GFP Tcons cells were injected into lethally irradiated B6D2 mice. (A) Splens from WT and Coro 1A<sup>-/-</sup> recipients were harvested 3 days post transplantation. Donor (GFP<sup>+</sup>) T cells were analyzed by flow cytometry for the loss of proliferation dye and expression of CD69, CD25, CD62L, and ICOS. n=4 for Coro 1A<sup>-/-</sup> and WT recipients. (B) 10 days post transplantation, mice were injected with BrdU. Four hours after injection, splens were harvested and analyzed by flow cytometry for BrdU uptake. n=3 for Coro 1A<sup>-/-</sup> and WT recipients. Representative sample shown. \*p<0.05 (C) Freshly isolated T cells from Coro 1A<sup>-/-</sup> mice were placed inside a chemotaxis chamber with indicated amounts of CCL19 or supernatant from bone marrow derived B6D2 dendritic cells.

### Supporting Information Figure 3

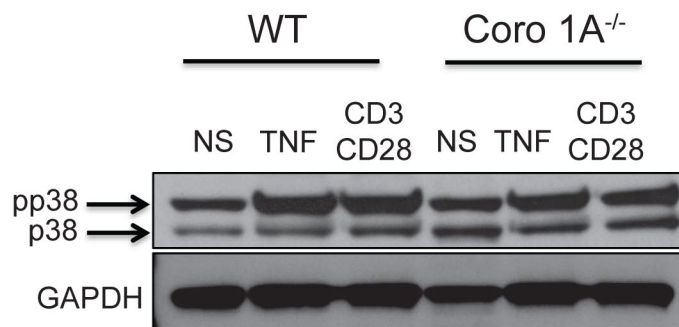

**Supporting Information Figure 3. p38 expression in Coro 1A<sup>-/-</sup> T-cells.**  $3 \times 10^6$  Coro 1A<sup>-/-</sup> or WT T cells were stimulated for 30 minutes with either 20ng of soluble TNF or 20  $\mu$ g of anti-CD3 and 10 $\mu$ g of anti-CD28 antibodies. Following stimulation the cells were harvested and western blots performed as described in *Materials and Methods*.
